## Phenotypic plasticity in chemical defence allows butterflies to diversify host use strategies

Érika C. P. de Castro<sup>1</sup>, Jamie Musgrove<sup>2</sup>, Søren Bak<sup>3</sup>, W. Owen McMillan<sup>2</sup>, and Chris D. Jiggins<sup>3</sup>

<sup>1</sup> Butterfly Genetics Group, Department of Zoology, University of Cambridge, United Kingdom.

<sup>2</sup> Smithsonian Tropical Research Institute, Panama.

<sup>3</sup>Plant Biochemistry, Department of Plant and Environmental Sciences, University of Copenhagen.

### Abstract

Hostplant specialization is a major force driving ecological niche partitioning and diversification in insect herbivores. The cyanogenic defences of *Passiflora* plants keeps most herbivores at bay, but not larvae of *Heliconius* butterflies, which can both sequester and biosynthesize cyanogenic compounds. Here, we demonstrate that both *Heliconius cydno chioneus*, a host plant generalist, and *H. melpomene rosina*, a specialist, have remarkable plasticity in their chemical defence. When feeding on *Passiflora* species with cyanogenic compounds they can readily sequester, both species downregulate the biosynthesis of these compounds. In contrast, when fed on *Passiflora* plants that do not contain cyanogenic glucosides that can be sequestered, both species increase biosynthesis. This biochemical plasticity comes at a significant fitness cost for specialist like *H. m. rosina*, as growth rates for this species negatively correlate with biosynthesis levels, but not for a generalist like *H. c. chioneus*. In exchange, *H. m. rosina* has increased performance when sequestration is possible as on its specialised hostplant. In summary, phenotypic plasticity in biochemical responses to different host plants offers these butterflies the ability to widen their range of potential host within the *Passiflora* genus, while maintaining their chemical defences.

## 1 INTRODUCTION

2 Phenotypic plasticity is widely recognised as an adaptation that allows organisms to survive in a  
3 variable environment [1]. Furthermore, there is interest in the idea that plasticity might permit  
4 populations to invade otherwise inaccessible niches or habitats [2][3]. Hostplant specialization is  
5 undoubtedly one of the most important forces driving diversification and shaping niche dimension for  
6 phytophagous insects [4][5]. Specialized insects often evolved not only to handle the chemical  
7 defences of their favorite hosts, but also to become dependent on plant compounds [6]. Whereas  
8 inducible defences of plants by herbivory has been well studied [7][8][9][10], there has been relatively  
9 little exploration of the mechanisms of biochemical plasticity in insect herbivores that could allow  
10 them to exploit diverse hosts [11].

11 The vast majority of aposematic butterflies acquired their toxic compounds from their larval hosts  
12 through sequestration. For example, the monarch butterfly sequesters cardenolides from milkweeds;  
13 swallowtails obtain Aristolochic acids from Aristolochiaceae; Ithomiini sequester pyrrolizidine  
14 alkaloids mostly from Solanaceae; and some toxic lycaenids acquired cycasin from Cycadales [6].  
15 Sequestration of plant toxins during larval feeding is an adaptation that arose in many butterfly groups  
16 and plays an important role in the antagonist coevolution with their hosts. In contrast to most  
17 butterflies, *Heliconius* species have the ability to both sequester and synthesise their own chemical  
18 defences. All *Heliconius* butterflies can *de novo* biosynthesize aliphatic cyanogenic glucosides (CNgLcs)  
19 using the amino acids valine and isoleucine as precursors [12] (see Figure 1 for CNgLcs structures).  
20 Their *Passiflora* host plants are also chemically defended by a broad range of CNgLcs [13], of which  
21 *Heliconius* can sequester aromatic, aliphatic, and especially simple cyclopentenyl during larval feeding  
22 [14][15][16]. To prevent sequestration, plants have responded by chemically modifying their  
23 defensive compounds. As an example, *H. melpomene* larvae can sequester cyclopentenyl CNgLcs but  
24 cannot sequester sulfonated cyclopentenyl CNgLcs from *P. caerulea* [15]. Other modified  
25 cyclopentenyl CNgLcs, such the bis-glycosilated CNgLcs, passiflorin from *P. biflora*, have not yet been  
26 tested for sequestration. Disabling sequestration would not make these plants distasteful or toxic for  
27 *Heliconius*, but it could reduce their I value as a host and have deleterious effects on their fitness. From  
28 the perspective of the herbivores therefore, switching between biosynthesis and sequestration of  
29 toxins could allow butterflies to colonise a wider array of potential host plants independently of  
30 sequestration, while also maintaining their chemical defences. Here, we explore phenotypic plasticity  
31 in this trade-off in two *Heliconius* species with different host use strategies.

32 The closely related species *Heliconius melpomene* and *Heliconius cydno* (diverged ~2 MYA) are often  
33 found in sympatry and their reproductive isolation is not complete (hybrid males are fertile) [17]. *H.*

34 *melpomene* is widespread in tropical America and lays eggs on several *Passiflora* species, but where it  
35 co-occurs with *Heliconius cydno*, is an ecological specialist, ovipositing mainly on *P. menispermifolia*  
36 (Panama) or *P. oerstedii* (Costa Rica and Colombia), although larvae are able to feed on a variety of  
37 species. In contrast, *H. cydno* is more generalist and oviposits on many *Passiflora* species  
38 [18][19][20][21]. These differences in oviposition preferences are genetically controlled [21]. Broadly,  
39 larval mortality and growth of both species are similar on different hosts [22], but a field experiment  
40 showed slightly higher establishment probability for *H. m. rosina* on *P. menispermifolia* [21]. Overall,  
41 experiments to date show only weak evidence for any adaptive advantage to the host specialisation  
42 of *H. melpomene* as compared to the more generalist strategy of *H. cydno*.

43 Nonetheless, these species show different host use strategies and feed on a variety of host plants with  
44 different chemical composition. Here, we take advantage of this ecology to explore plasticity in the  
45 balance between sequestration and biosynthesis of cyanogenic compounds among these two  
46 butterfly species, fed on four *Passiflora* species that produce different CNgls (Table 1). We also  
47 examine growth rates to explore whether there are possible trade-offs in fitness when feeding on  
48 different host plants or adopting different strategies of chemical defence. Phenotypic plasticity in  
49 sequestration versus biosynthesis of CNgls defences could facilitate host switching and diversification  
50 of *Heliconius* across the *Passiflora* radiation.

51

52 **Table 1.** The CNgls composition of the *Passiflora* species utilized in this study.

|                           | Aliphatic<br>CNgls | Aromatic<br>CNgls | Simple<br>Cyclopentenyl<br>CNgls | Modified<br>Cyclopentenyl<br>CNgls |
|---------------------------|--------------------|-------------------|----------------------------------|------------------------------------|
| <i>P. vitifolia</i>       | -                  | -                 | -                                | <b>Tetraphyllin B<br/>sulphate</b> |
| <i>P. platyloba</i>       | -                  | <b>Prunasin</b>   | -                                | -                                  |
| <i>P. menispermifolia</i> | -                  | -                 | <b>Deidaclin</b>                 | -                                  |
| <i>P. biflora</i>         | -                  | -                 | -                                | <b>Passibiforin</b>                |

53

54

## 55 METHODS

### 56 Butterfly rearing

57 Butterflies used in this study were reared at the Smithsonian Tropical Research Institute, Gamboa,  
58 Panama. Mated female stocks of *H. cydno chioneus* and *H. melpomene rosina* were maintained in  
59 insectary cages and fed *ad libidum* with flowers (*Psiguria triphylla*, *Gurania eriantha*, *Psychotria*  
60 *poepigiana*, *Lantana sp.*) and artificial nectar (10% sugar solution). Plants of one of the four species

61 used in the experiment - *P. biflora*, *P. menispermifolia*, *P. platyloba*, and *P. vitifolia* - were always kept  
62 in cages for oviposition. Eggs were collected daily from host plants and kept in closed plastic cups)  
63 until hatching. On the morning of hatching, larvae were transferred to treatment-specific cages onto  
64 individual shoots. Young shoots with no evidence of herbivory were selected to minimise the effects  
65 of variable host quality. Suitable shoots were sterilized and placed into water-filled bottles sealed with  
66 cotton. Cages were checked every day and fresh shoots provided regularly. Pupae were immediately  
67 removed, weighed after one day of pupation and taped on the lid of individual 350 ml plastic tubes.  
68 After eclosion, butterflies were left in their individual tubes for a few hours to dry their wings and then  
69 removed for body measurements: total weight, forewing length and body length. Body length was  
70 measured from the end of the head to the end of the abdomen using mechanical callipers, and  
71 forewing length was measured from the central base to the most distal point. Butterflies were added  
72 into tubes containing 1.5 mL methanol 80% (v/v), sealed with Parafilm and stored at 4 °C.

### 73 Chemical Analyses

74 Samples were homogenized in 1.5 methanol 80% (v/v) where they were soaked and centrifuged at  
75 10,000 x g for 5 min. Supernatants were collected and kept in HPLC vials at -20 °C. Sample aliquots  
76 were filtered (Anapore 0.45 µm, Whatman) to remove insoluble components and diluted 50X times  
77 (v/v) in ultrapure water and injected into an Agilent 1100 Series LC (Agilent Technologies, Germany)  
78 hyphenated to a Bruker HCT-Ultra ion trap mass spectrometer (Bruker Daltonics, Bremen, Germany).  
79 Chromatographic separation was carried out using a Zorbax SB-C18 column (Agilent; 1.8µM,  
80 2.1x50mm). MS and LC conditions are described in [16]. The sensitivity of the analytical system was  
81 monitored by running a pooled sample after each 20 experimental sample.

82 Sodium adducts of CNgIcs detected in the butterflies were identified by comparing their m/z  
83 fragmentation patterns and RTs to authentic standards (Jaroszewski et al. 2002; Møller et al. 2016).  
84 Quantification of CNgIcs present were estimated based on the Extracted Ion Chromatogram peak  
85 areas of each compounds and calculated from a standard curve of linamarin, lotaustralin, and  
86 amygdalin.

### 87 Statistical Analyses

88 All statistical analyses were performed using R version 3.5.1 (R Core Team, 2017). Two-ways ANOVA  
89 was used to examine the interaction between butterfly species, larval diet, and sex for different  
90 biological traits (pupal weight, adult weight, forewing length, body size, and total CNgIcs). One-way  
91 ANOVA followed by Tukey HSD tests were used to make pairwise comparisons between diets and  
92 analyse, within butterfly species, the effects of each diet on the measured traits.

93 **RESULTS**

94 Larval diet affected the CNglc composition in adult butterflies of *H. melpomene* and *H. cydno* (Figure  
 95 1). Both species sequestered deidaclin when fed as larvae on *P. menispermifolia* plants, although *H.*  
 96 *melpomene* sequestered significantly more deidaclin than *H. cydno* (ANOVA,  $F_{1,22} = 8.851$ ;  $p = 0.00699$ ).  
 97 Sequestration of deidaclin from *P. menispermifolia* was associated with a reduction of linamarin and  
 98 lotaustralin biosynthesis in comparison with other diets. The modified CNglc passibiflorin from *P.*  
 99 *biflora* and tetraphyllin B-sulphate from *P. vitifolia* were not found in both butterfly species raised on  
 100 these diets, suggesting that they cannot sequester these compounds. Surprisingly, prunasin recently  
 101 found in the haemolymph of larvae raised on *P. platyloba* [15] was not present in adults of either  
 102 butterfly species. Instead, the derivative prunasin amide was found in adults reared on *P. platyloba*  
 103 suggesting that they sequestered prunasin, but turned over into this compound to the corresponding  
 104 amide during pupation.

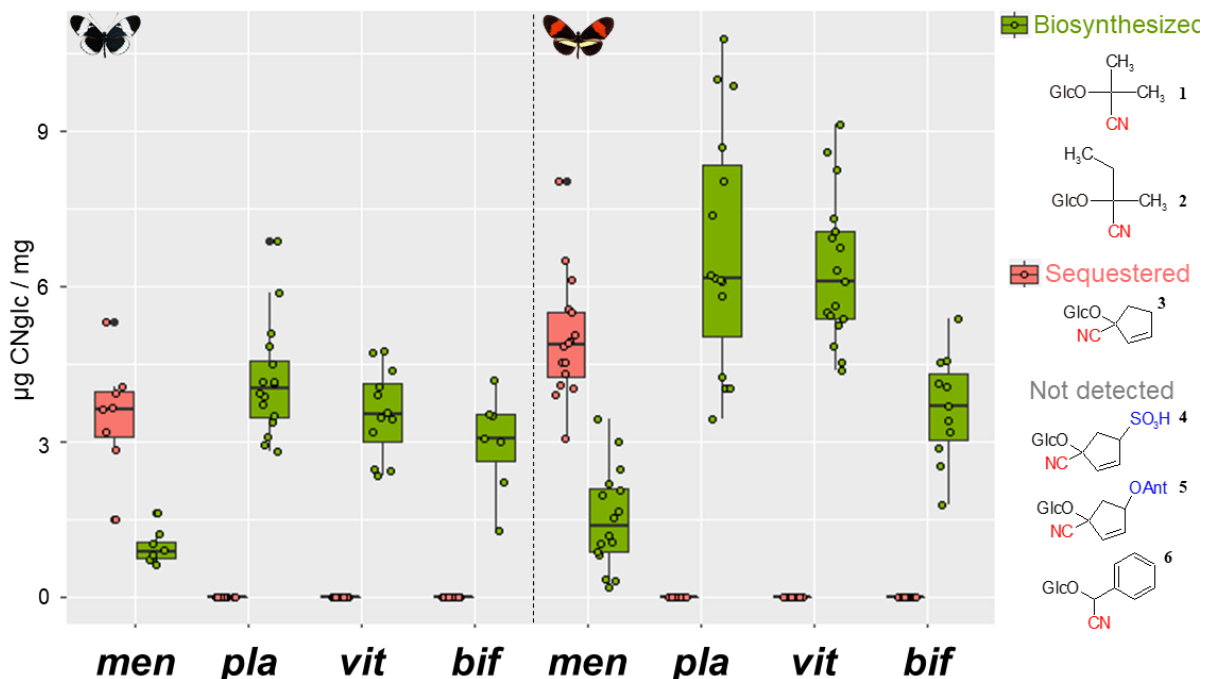

105

106 **Figure 1.** CNglc composition of *H. cydno* (left) and *H. melpomene* (right) raised on different *Passiflora*  
 107 diet. Legend: vit= *P. vitifolia*, pla= *P. platyloba*, men= *P. menispermifolia*; bif= *P. biflora*. Green boxplots  
 108 correspond to the biosynthesized cyanogens, linamarin<sup>1</sup> and lotaustralin<sup>2</sup>, found in all butterflies.  
 109 Salmon boxplots correspond to the sequestered CNglcs deidaclin<sup>3</sup> only detected in butterflies raised  
 110 on *P. menispermifolia*. Tetraphyllin B-sulphate<sup>4</sup>, passibiflorin<sup>5</sup> and prunasin<sup>6</sup> were not detected in  
 111 butterflies, even though they were present in the food plants *P. vitifolia*, *P. biflora* and *P. platyloba*,  
 112 respectively. CNglcs present in each host plant is described in Table 1.

113

114 Larval diet not only influenced the composition, but also the total concentration of CNglcs in both  
 115 species (ANOVA, *H. cydno*:  $F_{3,39} = 3.653$ ,  $p = 0.0205$ ; *H. melpomene*:  $F_{3,55} = 8.776$ ,  $p = 0.00007$ ) (Figure  
 116 2A). Both species had less CNglcs when reared on *P. biflora*, which they normally do not use as a host.

117 On average, butterflies also had a higher CNglcs content when reared on *P. menispermifolia* than on  
118 *P. platyloba* and *P. vitifolia*, though these differences were only statistically significant for *H. cydno*.  
119 CNglc concentrations in *H. cydno* ( $3.85 \pm 1.08$ ) were on average lower than *H. melpomene* ( $5.96 \pm$   
120  $1.97$ ).

121 Larval diet also affected size and weight of both species. Forewing size of *H. cydno* (ANOVA,  $F_{3,39} = 5.14$ ;  
122  $p = 0.004$ ) was larger and more strongly influenced by larval diet than *H. melpomene* (ANOVA,  $F_{3,57} =$   
123  $4.0$ ;  $p = 0.012$ ) (Figure 2B). *H. cydno* had larger forewings when fed on *P. vitifolia* and *P. biflora*, and  
124 smaller on *P. menispermifolia* and *P. platyloba*. In contrast, adults of *H. melpomene* had larger  
125 forewings when reared on *P. menispermifolia* and *P. biflora*, and smaller on *P. vitifolia* and *P. platyloba*.  
126 Sexual differences in forewing size were not observed in either species (ANOVA, *H. melpomene*:  $F_{1,59} =$   
127  $0.369$ ,  $p = 0.546$ ; *H. cydno*:  $F_{1,41} = 1.575$ ,  $p = 0.217$ ). Broadly similar effects were seen for pupal weight,  
128 butterfly weight and body size, as for forewing size (Figure S1).

129 In order to verify whether sequestration versus biosynthesis has a significant effect on fitness of both  
130 species, we tested for a correlation between concentration of biosynthesized CNglcs and forewing size  
131 (Figure 2C). In the generalist *H. cydno*, even though larval diet strongly affects forewing size, this effect  
132 is not correlated with whether they biosynthesize ( $R^2 = 0.619$ ,  $F_{1,41} = 2.707$ ,  $p = 0.108$ ) or sequester ( $R^2 =$   
133  $0.09$ ,  $F_{1,41} = 4.081$ ,  $p = 0.05$ ) CNglcs. Whilst, in the specialist *H. melpomene*, there is a negative  
134 correlation between CNglc biosynthesis and forewing size ( $R^2 = 0.1339$ ,  $F_{1,57} = 8.814$ ,  $p = 0.004$ ), even  
135 when its favourite diet was removed of the analyses ( $R^2 = 0.086$ ,  $F_{1,53} = 4.979$ ,  $p = 0.03$ ). This suggests  
136 that CNglcs biosynthesis has a fitness cost for *H. melpomene rosina*, which mostly lay eggs on *P.*  
137 *menispermifolia* and sequester CNglcs from it during larval feeding. Additionally, there was a positive  
138 correlation between forewing size and concentration of sequestered CNglcs in *H. melpomene* ( $R^2 =$   
139  $0.1466$ ,  $F_{1,57} = 9.979$ ,  $p = 0.003$ ), indicating that larvae that are better sequestering CNglcs tend to turn  
140 into bigger butterflies.

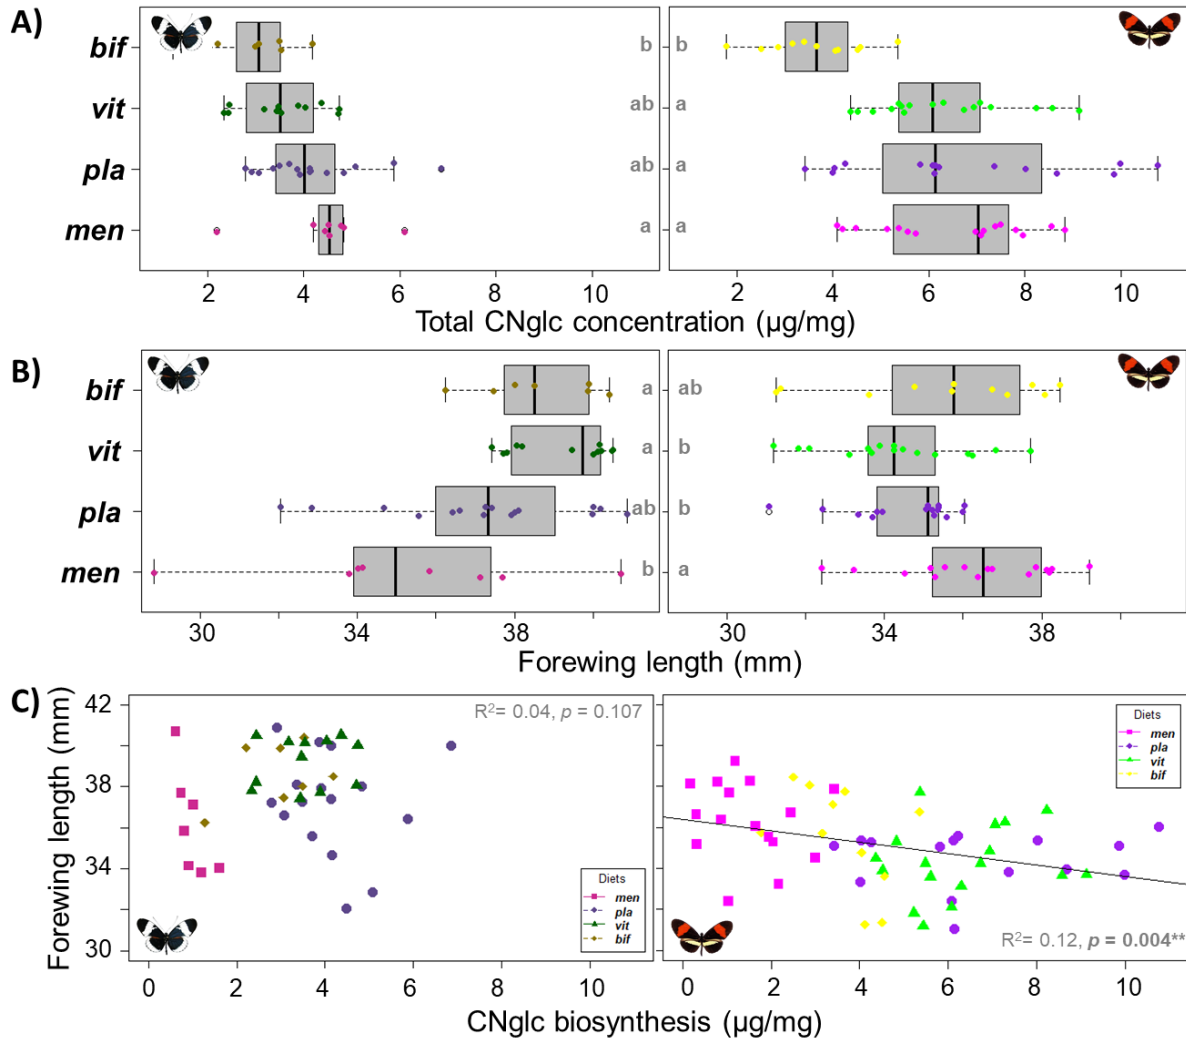

141  
142  
143  
144  
145  
146  
147  
148

**Figure 2.** Effect of larval diet on **A)** total CNgls concentration and **B)** forewing length of *H. cydno* (left) and *H. melpomene* (right). Letters over boxplots correspond to post-hoc comparisons (Tukey HSD) within butterfly species, where different letters indicate statistically significant treatments. **C)** Correlation between forewing length and concentration of biosynthesized CNgls in *H. cydno* (left) and *H. melpomene* (right). Legend: *vit*= *P. vitifolia*, *pla*= *P. platyloba*, *men*= *P. menispermifolia*; *bif*= *P. biflora*.

## 149 DISCUSSION

150 We documented, for the first time, plasticity in CNgls composition and concentration for both *H.*  
151 *melpomene rosina* and *H. cydno chioneus* in response to their larval diet (Figure 1 and 2). We  
152 confirmed that when feeding on a plant with cyclopentenyl CNgls that can be sequestered (*i. e.*  
153 deidaclin in *P. menispermifolia*), both butterfly larvae invest less in biosynthesis of aliphatic CNgls, a  
154 trade-off that has previously been proposed at the level of inter-species comparisons [23][16]. This  
155 plasticity should facilitate *Heliconius* butterflies adapt to exploit different *Passiflora* hosts, they could  
156 utilize plants regardless of their CNgls profile because they can maintain their defences through  
157 biosynthesis when sequestration is not possible.

158 Regardless of how they acquired their cyanogenic defences, both butterflies gained similar total  
159 concentration of CNglcs when raised on their natural host range (*P. platyloba*, *P. menispermifolia* and  
160 *P. vitifolia*). A similar pattern has been observed in the six-pot burnet moth *Zygaena filipendulae*,  
161 another rare example of lepidopteran that can both *de novo* biosynthesize and sequester their  
162 chemical defences [25]. *Z. filipendulae* balance their cyanogenic content with biosynthesis in the  
163 absent of sequestration, however with deleterious consequences for their growth[26][27]. It is likely  
164 that, as in *Zygaena* moths, *Heliconius* have adaptations to optimize the energetic cost of their toxicity:  
165 deactivating the biosynthesis of CNglcs when these compounds are available for sequestration and  
166 reactivating it when they are not.

167 Although adult size and weight of *H. cydno* were strongly influenced by their larval diet (Figure 2),  
168 these differences were not correlated with whether they acquired their CNglcs through biosynthesis  
169 or sequestration. This suggests that plasticity in the generalist species does not come with a significant  
170 energetic cost. In contrast, *H. melpomene* grows bigger (Figure 2B and S1) when favouring  
171 sequestration over biosynthesis, suggesting that it has adapted to its specialist lifestyle and has a  
172 significant cost to the plasticity involved in switching host plants.

173 Smiley (1978) emphasized that ecological factors involved in the initial choice of a host plant might  
174 not be the same that led to the maintenance of this preference. It seems likely that the Panamanian  
175 *H. melpomene* only recently evolved a preference for *P. menispermifolia*. Once this oviposition  
176 preference established, selection for digestive adaptations to maximise the larval performance on this  
177 diet would take a place - *e. g.* increasing the efficiency of CNglc uptake from *P. menispermifolia* as we  
178 observed in this study (Figure 1). Local and recent adaptation to larval feeding on *P. menispermifolia*  
179 might also explain why *H. melpomene* performs only slightly better on this diet (Figure 2B and S1).  
180 Nonetheless, for the preferred host *P. menispermifolia* we have shown, for the first time, that this is  
181 a good host for *H. melpomene*, but a less optimal host for *H. cydno*.

182 In Panama, avoidance of interspecific competition is likely to be a major force shaping the evolution  
183 hostplant range, since coexistent *Heliconius* species rarely shared oviposition preference for the same  
184 *Passiflora*: *H. erato* lays eggs preferably on *P. biflora*, *H. hecale* on *P. vitifolia*, *H. sara* on *P. auriculata*  
185 and *H. melpomene* on *P. menispermifolia*[21][28]. Niche partitioning not only happens for *Passiflora*  
186 hosts, but also at microhabitat level: whereas most *Heliconius* species, including the comimics *H.*  
187 *melpomene* and *H. erato*, are found in open secondary forest, *H. cydno* and *H. sapho* are typically  
188 present in the closed-canopy [29]. A similar pattern of resources partitioning (plant and microhabitat)  
189 occurs in Colombia [19]. Thus, interspecific competition might have led *H. melpomene* to evolve  
190 specialized oviposition preferences for *P. menispermifolia* and pushed *H. cydno* to inhabit forest where



191 *Passiflora* species are less abundant and a generalist strategy might be favoured. The phenotypic  
192 plasticity in their biochemistry enabled *Heliconius* butterflies to widen their range of *Passiflora* host  
193 and led to niche diversification while maintaining their chemical defences, allowing the coexistence of  
194 multiple *Heliconius* species.

195 Finally, the vast majority of aposematic moths and butterflies sequester their toxic compounds from  
196 their larval host, emphasizing the importance of this process in the coevolution between plants and  
197 lepidopterans [30]. In turn, many *Passiflora* species seems to have modified their cyclopentenyl  
198 CNgls to disable sequestration by heliconiines [16]. Here, we show that the two modified CNgls  
199 passibiflorin (*bis*-glycosylated) and tetraphylli-B sulphate (sulphonated) were not sequestered by  
200 both *Heliconius* species, suggesting counter-evolution in the plants to deter their herbivores.

201 Our findings, based on *Heliconius* butterflies and its *Passiflora* host, highlight the importance of  
202 phenotypic plasticity in biochemical traits for the diversification of herbivorous insects. A large  
203 proportion of global biodiversity is represented by tropical herbivorous insects, so understanding how  
204 genetic and plastic traits allow species to adapt their host niche and permit species to coexist is an  
205 important step towards understanding biodiversity.

206

## 207 REFERENCES

- 208 1. Ashander J, Chevin LM, Baskett ML. 2016 Predicting evolutionary rescue via evolving plasticity  
209 in stochastic environments. *Proc. R. Soc. B Biol. Sci.* **283**. (doi:10.1098/rspb.2016.1690)
- 210 2. Fordyce JA, Nice CC. 2008 Antagonistic, stage-specific selection on defensive chemical  
211 sequestration in a toxic butterfly. *Evolution (N. Y.)*. **62**, 1610–1617. (doi:10.1111/j.1558-  
212 5646.2008.00388.x)
- 213 3. Turner KG, Fréville H, Rieseberg LH. 2015 Adaptive plasticity and niche expansion in an  
214 invasive thistle. *Ecol. Evol.* **5**, 3183–3197. (doi:10.1002/ece3.1599)
- 215 4. Ehrlich PR, Raven RJ. 1964 Butterflies and Plants : A Study in Coevolution Author. *Soc. Study*  
216 *Evol.* **18**, 586–608.
- 217 5. Althoff DM, Segreaves KA, Johnson MTJ. 2014 Testing for coevolutionary diversification:  
218 Linking pattern with process. *Trends Ecol. Evol.* **29**, 82–89. (doi:10.1016/j.tree.2013.11.003)
- 219 6. Nishida R. 2002 Sequestration of defensive substances from plants by Lepidoptera. *Annu.*  
220 *Rev. Entomol.* , 57–92.

- 221 7. Gleadow RM, Møller BL. 2014 Cyanogenic glycosides: synthesis, physiology, and phenotypic  
222 plasticity. *Annu. Rev. Plant Biol.* **65**, 155–85. (doi:10.1146/annurev-arplant-050213-040027)
- 223 8. Agrawal AA, Conner JK, Johnson MTJ, Wallsgrove R. 2002 Ecological genetics of an induced  
224 plant defense against herbivores: Additive genetic variance and costs of phenotypic plasticity.  
225 *Evolution (N. Y.)*. **56**, 2206–2213. (doi:10.1111/j.0014-3820.2002.tb00145.x)
- 226 9. Metlen KL, Aschehoug ET, Callaway RM. 2009 Plant behavioural ecology: Dynamic plasticity in  
227 secondary metabolites. *Plant, Cell Environ.* **32**, 641–653. (doi:10.1111/j.1365-  
228 3040.2008.01910.x)
- 229 10. Baldwin IT. 1999 Inducible nicotine production in native *Nicotiana* as an example of adaptive  
230 phenotypic plasticity. *J. Chem. Ecol.* **25**, 3–30. (doi:10.1023/A:1020880931488)
- 231 11. Petschenka G, Agrawal AA. 2015 Milkweed butterfly resistance to plant toxins is linked to  
232 sequestration, not coping with a toxic diet. *Proc. R. Soc. B Biol. Sci.* **282**.  
233 (doi:10.1098/rspb.2015.1865)
- 234 12. Nahrstedt A, Davis RH. 1983 Occurrence, variation and biosynthesis of the cyanogenic  
235 glucosides linamarin and lotaustralin in species of the Heliconiini (Insecta: Lepidoptera).  
236 *Comp. Biochem. Physiol. -- Part B Biochem.* **75**, 65–73. (doi:10.1016/0305-0491(83)90041-X)
- 237 13. Jaroszewski JW, Olafsdottir ES, Wellendorph P, Christensen J, Franzyk H, Somanadhan B,  
238 Budnik B a, Jørgensen LB, Clausen V. 2002 Cyanohydrin glycosides of *Passiflora*: distribution  
239 pattern, a saturated cyclopentane derivative from *P. guatemalensis*, and formation of  
240 pseudocyanogenic alpha-hydroxyamides as isolation artefacts. *Phytochemistry* **59**, 501–11.
- 241 14. Engler HS, Spencer KC, Gilbert LE. 2000 Preventing cyanide release from leaves. *Nature* **406**,  
242 144–5. (doi:10.1038/35018159)
- 243 15. Pinheiro de Castro ÉC, Demirtas R, Orteu A, Olsen CE, Motawie MS, Zikan Cardoso M,  
244 Zagrobelny M, Bak S. 2020 The dynamics of cyanide defences in the life cycle of an  
245 aposematic butterfly: Biosynthesis versus sequestration. *Insect Biochem. Mol. Biol.* **116**,  
246 103259. (doi:10.1016/j.ibmb.2019.103259)
- 247 16. de Castro ÉCP, Zagrobelny M, Zurano JP, Cardoso MZ, Feyereisen R, Bak S. 2019  
248 Sequestration and biosynthesis of cyanogenic glucosides in passion vine butterflies and  
249 consequences for the diversification of their host plants. *Ecol. Evol.* **9**, 5079–5093.  
250 (doi:10.1002/ece3.5062)

- 251 17. Naisbit RE, Jiggins CD, Linares M, Salazar C, Mallet J. 2002 Hybrid sterility, Haldane's rule and  
252 speciation in *Heliconius cydno* and *H. melpomene*. *Genetics* **161**, 1517–1526.
- 253 18. Smiley J. 1978 Plant Chemistry and the Evolution of Host Specificity: New Evidence from  
254 *Heliconius* and *Passiflora*. *Science (80-. )*. **201**, 745–747.
- 255 19. Giraldo N, Salazar C, Jiggins CD, Bermingham E, Linares M. 2008 Two sisters in the same  
256 dress: *Heliconius* cryptic species. *BMC Evol. Biol.* **8**. (doi:10.1186/1471-2148-8-324)
- 257 20. Naisbit RE. 2001 Ecological divergence and speciation in *Heliconius cydno* and *H. melpomene*.  
258 University of London. See <https://www.ucl.ac.uk/taxome/lit/naisbitthesis02.pdf>.
- 259 21. Merrill RM, Naisbit RE, Mallet J, Jiggins CD. 2013 Ecological and genetic factors influencing the  
260 transition between host-use strategies in sympatric *Heliconius* butterflies. *J. Evol. Biol.* **26**,  
261 1959–1967. (doi:10.1111/jeb.12194)
- 262 22. Smiley J. 1978 Plant chemistry and the evolution of host specificity: New evidence from  
263 *Heliconius* and *Passiflora*. *Science (80-. )*. **201**, 745–747. (doi:10.1126/science.201.4357.745)
- 264 23. Engler-Chaouat HS, Gilbert LE. 2007 De novo synthesis vs. sequestration: Negatively  
265 correlated metabolic traits and the evolution of host plant specialization in cyanogenic  
266 butterflies. *J. Chem. Ecol.* **33**, 25–42. (doi:10.1007/s10886-006-9207-8)
- 267 24. Engler-Chaouat HS, Gilbert LE. 2007 De novo synthesis vs. sequestration: negatively  
268 correlated metabolic traits and the evolution of host plant specialization in cyanogenic  
269 butterflies. *J. Chem. Ecol.* **33**, 25–42. (doi:10.1007/s10886-006-9207-8)
- 270 25. Zagrobelny M, de Castro É, Møller B, Bak S. 2018 Cyanogenesis in Arthropods: From Chemical  
271 Warfare to Nuptial Gifts. *Insects* **9**, 51. (doi:10.3390/insects9020051)
- 272 26. Zagrobelny M, Bak S, Ekstrøm CT, Olsen CE, Møller BL. 2007 The cyanogenic glucoside  
273 composition of *Zygaena filipendulae* (Lepidoptera: Zygaenidae) as effected by feeding on  
274 wild-type and transgenic lotus populations with variable cyanogenic glucoside profiles. *Insect*  
275 *Biochem. Mol. Biol.* **37**, 10–8. (doi:10.1016/j.ibmb.2006.09.008)
- 276 27. Fürstenberg-hägg J, Zagrobelny M, Erik C, Jørgensen K, Lindberg B, Bak S. 2014  
277 Transcriptional regulation of de novo biosynthesis of cyanogenic glucosides throughout the  
278 life-cycle of the burnet moth *Zygaena filipendulae* (Lepidoptera). *Insect Biochem. Mol. Biol.*  
279 **49**, 80–89. (doi:10.1016/j.ibmb.2014.04.001)
- 280 28. Benson WW, Brown KSJ, Gilbert LE. 1975 Coevolution of plants and herbivores: Passion

281 flower butterflies. *Evolution* (N. Y). **29**, 659–680. (doi:10.2307/2407076)

282 29. Estrada C, Jiggins CD. 2002 Patterns of pollen feeding and habitat preference among  
283 *Heliconius* species. *Ecol. Entomol.* **27**, 448–456. (doi:10.1046/j.1365-2311.2002.00434.x)

284 30. Nishida R. 2002 Sequestration of defensive substances from plants by lepidoptera. *Annu. Rev.*  
285 *Entomol.* **47**, 57–92.

286

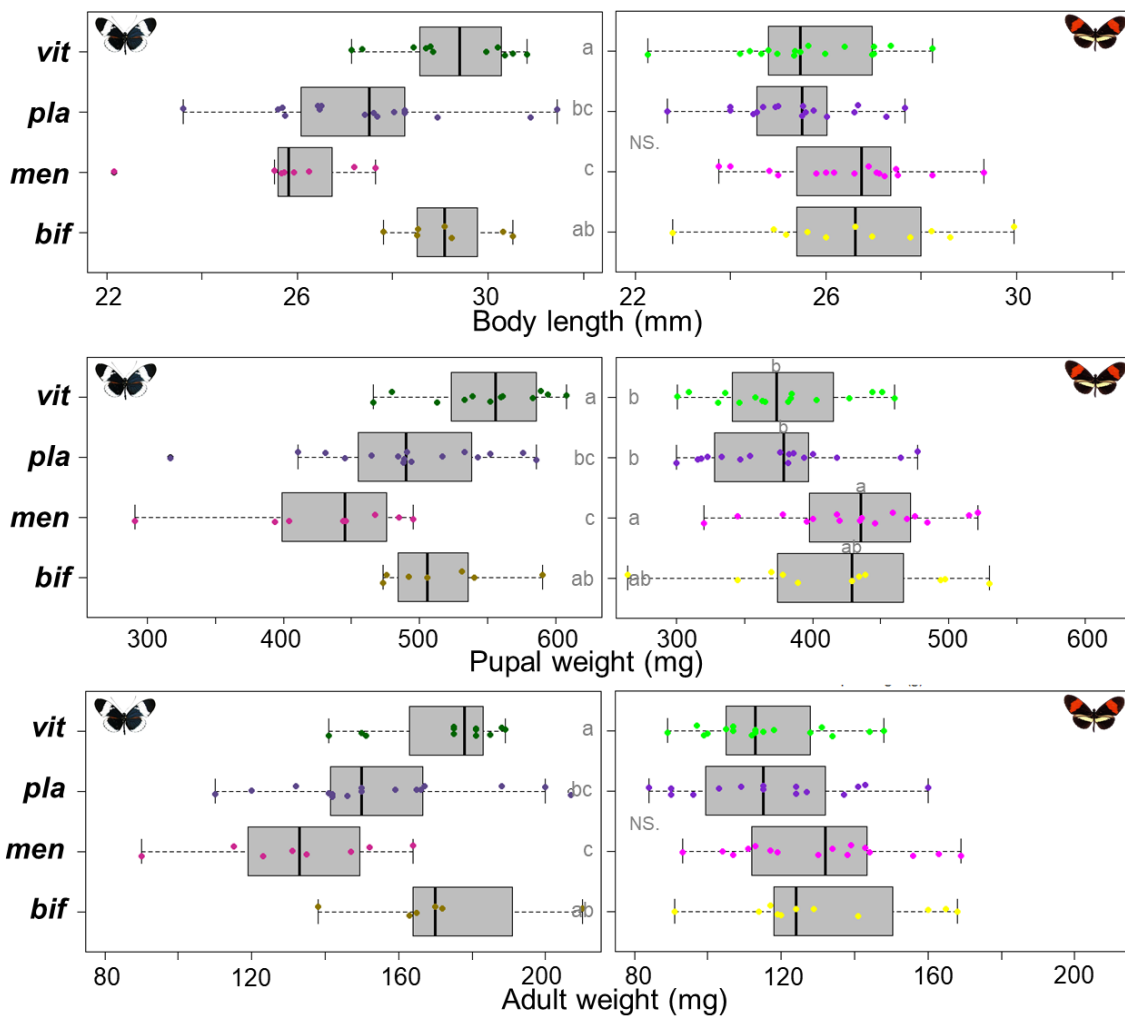

287

288 **Figure S1.** Effect of larval diet on body length, pupal weight and adult weight of *H. cydno* (left) and *H.*  
289 *melpomene* (right). Letters over boxplots correspond to post-hoc comparisons (Tukey HSD) within  
290 butterfly species, where different letters indicate statistically significant treatments. Legend: vit= *P.*  
291 *vitifolia*, pla= *P. platyloba*, men= *P. menispermifolia*; bif= *P. biflora*.

292

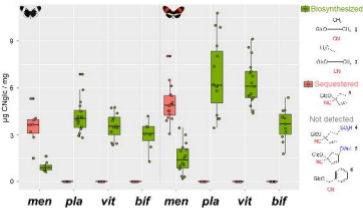

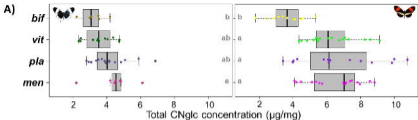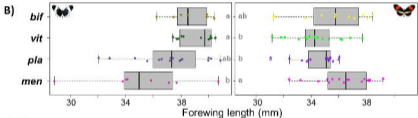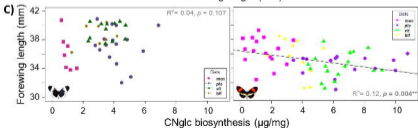

Source: https://www.biorxiv.org/content/10.1101/2020.04.07.030122v1.full.pdf
